# Supplementary material for: Ultra-high performance liquid chromatography coupled with time-of-flight mass spectrometry screening and analysis of potential bioactive compounds from traditional chinese medicine Kai-Xin-San, using a multivariate data processing approach and the MetaboLynx tool
Source: Royal Society of Chemistry journal article supplement (doi:10.1039/c4ra08992h), 2014-10-09
Supplement: c4ra08992h1.pdf [file c4ra08992h1.pdf]

**Table S1.** The identified results of the constituents in rat plasma after oral administration of KXS by UPLC/Q-TOF-MS/MS and multivariate data processing approach.

| No | Rt/<br>min | Compound               | Positive (m/z) | Negative (m/z) | Formula | MW(Da)   | Fragment ions (m/z)                                                                                                                                                                                                                                                             | Origin |
|----|------------|------------------------|----------------|----------------|---------|----------|---------------------------------------------------------------------------------------------------------------------------------------------------------------------------------------------------------------------------------------------------------------------------------|--------|
| 1  | 0.83       | Bergapten              | —              | —              | —       | 216.0423 | 215[M-H] <sup>-</sup> , 179[M-H-3C] <sup>-</sup> ,<br>161[M-H-C <sub>3</sub> H <sub>2</sub> O] <sup>-</sup> , 89[M-H-C <sub>7</sub> H <sub>10</sub> O <sub>2</sub> ] <sup>-</sup>                                                                                               | d      |
| 2  | 0.90       | Mannose                | —              | —              | —       | 180.0634 | 179[M-H] <sup>-</sup> , 161[M-H-H <sub>4</sub> O] <sup>-</sup> , 96[M-H-CH <sub>8</sub> O <sub>4</sub> ] <sup>-</sup>                                                                                                                                                           | a      |
| 3  | 0.93       | Valine                 | 118.0863       | 2.9            | —       | 117.0790 | 103[M+H-NH] <sup>+</sup> , 100[M+H-H <sub>2</sub> O] <sup>+</sup>                                                                                                                                                                                                               | d      |
| 4  | 0.93       | Dimethyl(R)-(+)-malate | —              | —              | —       | 162.0528 | 148[M+H-CH <sub>3</sub> ] <sup>+</sup> , 119[M+H-C <sub>2</sub> H <sub>4</sub> O] <sup>+</sup> ,<br>161[M-H] <sup>-</sup> , 142[M-H-H <sub>2</sub> O] <sup>-</sup> ,<br>99[M-H-2CH <sub>2</sub> OH] <sup>-</sup> , 57[M-H-2CH <sub>2</sub> OH-CO-CH <sub>2</sub> ] <sup>-</sup> | b      |
| 5  | 1.12       | Sucrose                | —              | —              | —       | 342.1162 | 341[M-H] <sup>-</sup> , 179[M-H-(Glc-H <sub>2</sub> O)] <sup>-</sup> ,<br>161[M-H-Glc] <sup>-</sup> , 119[M-H-(Glc-H <sub>2</sub> O)-CO <sub>3</sub> ] <sup>-</sup> ,<br>113[M-H-Glc-CH <sub>4</sub> O <sub>2</sub> ] <sup>-</sup>                                              | a, c   |
| 6  | 1.54       | Nicotinic acid         | 124.0399       | -              | —       | 123.0320 | 124[M+H] <sup>+</sup> , 108[M+H-O] <sup>+</sup> ,<br>106[M+H-H <sub>2</sub> O] <sup>+</sup> , 80[M+H-C <sub>2</sub> H <sub>6</sub> N] <sup>+</sup>                                                                                                                              | a      |
| 7  | 1.62       | Benzoic acid           | 123.0446       | 1.8            | —       | 122.0368 | 123[M+H] <sup>+</sup> , 108[M+H-O] <sup>+</sup>                                                                                                                                                                                                                                 | d      |
| 8  | 1.62       | Adenine                | 136.0623       | 1.2            | —       | 135.0545 | 136[M+H] <sup>+</sup> , 119[M+H-H <sub>3</sub> N] <sup>+</sup> , 109[M+H-CHN] <sup>+</sup>                                                                                                                                                                                      | b      |

|    |      |                                    |          |          |              |      |                      |          |                                                                                                                                                                                                                                                                                                                                                                                                                                                                                                                                                                                                                                                                                                         |   |
|----|------|------------------------------------|----------|----------|--------------|------|----------------------|----------|---------------------------------------------------------------------------------------------------------------------------------------------------------------------------------------------------------------------------------------------------------------------------------------------------------------------------------------------------------------------------------------------------------------------------------------------------------------------------------------------------------------------------------------------------------------------------------------------------------------------------------------------------------------------------------------------------------|---|
| 9  | 1.62 | Adenosine                          | 268.1046 | 1.8      | —            | —    | $C_{10}H_{13}N_5O_4$ | 267.0968 | 268[M+H] <sup>+</sup> , 136[M+H-C <sub>4</sub> H <sub>10</sub> N <sub>3</sub> O <sub>2</sub> ] <sup>+</sup> , 119[M+H-C <sub>5</sub> H <sub>13</sub> N <sub>2</sub> O <sub>3</sub> ] <sup>+</sup>                                                                                                                                                                                                                                                                                                                                                                                                                                                                                                       | a |
| 10 | 2.41 | Sibiricose A1                      | —        | —        | 547.166<br>3 | -1.5 | $C_{23}H_{32}O_{16}$ | 548.1741 | 547[M-H] <sup>-</sup> , 385[M-H-(Fru-H <sub>2</sub> O)] <sup>-</sup> , 367[M-H-Fru] <sup>-</sup> ,<br>325[M-H-C <sub>11</sub> H <sub>10</sub> O <sub>5</sub> ] <sup>-</sup> , 223[M-H-Fru-(Glc-2H <sub>2</sub> O)] <sup>-</sup> ,<br>205[M-H-Fru-(Glc-H <sub>2</sub> O)] <sup>-</sup>                                                                                                                                                                                                                                                                                                                                                                                                                   | c |
| 11 | 2.61 | Ethyl benzoylacetate*              | 193.0821 | -<br>2.6 | —            | —    | $C_{11}H_{12}O_3$    | 192.0786 | 193[M+H] <sup>+</sup> , 165[M+H-CO] <sup>+</sup> , 150[M+H-CO-CH <sub>3</sub> ] <sup>+</sup> ,<br>135[M+HCO-2CH <sub>3</sub> ] <sup>+</sup>                                                                                                                                                                                                                                                                                                                                                                                                                                                                                                                                                             | c |
| 12 | 2.63 | Salicylic acid                     | —        | —        | 137.023<br>9 | -1.9 | $C_7H_6O_3$          | 138.0317 | 137[M-H] <sup>-</sup> , 108[M-H-2O] <sup>-</sup>                                                                                                                                                                                                                                                                                                                                                                                                                                                                                                                                                                                                                                                        | a |
| 13 | 2.95 | PolygalaxanthoneIII                | —        | —        | 567.133<br>2 | -5.3 | $C_{25}H_{28}O_{15}$ | 568.1428 | 569[M+H] <sup>+</sup> , 551[M+H-H <sub>2</sub> O] <sup>+</sup> , 317[M+H-Api-C <sub>4</sub> H <sub>6</sub> O <sub>3</sub> ] <sup>+</sup> ,<br>287[M+H-(Api-H <sub>2</sub> O)-C <sub>6</sub> H <sub>14</sub> O <sub>4</sub> ] <sup>+</sup> ,<br>567[M-H] <sup>-</sup> , 447[M-H-C <sub>7</sub> H <sub>4</sub> O <sub>2</sub> ] <sup>-</sup> , 417[M-H-Api] <sup>-</sup> ,<br>345[M-H-Api-C <sub>3</sub> H <sub>4</sub> O <sub>2</sub> ] <sup>-</sup> , 315[M-H-Api-C <sub>4</sub> H <sub>6</sub> O <sub>3</sub> ] <sup>-</sup> ,<br>272[M-H-(Api-H <sub>2</sub> O)-C <sub>8</sub> H <sub>3</sub> O <sub>4</sub> ] <sup>-</sup> , 259[M-H-Api-C <sub>6</sub> H <sub>6</sub> O <sub>5</sub> ] <sup>-</sup> | c |
| 14 | 3.62 | 1-(3,4-Dimethoxyphenyl)ethan-1-one | 181.0865 | -<br>2.2 | —            | —    | $C_{10}H_{12}O_3$    | 180.0786 | 181[M+H] <sup>+</sup> , 166[M+H-CH <sub>3</sub> ] <sup>+</sup> ,<br>151[M+H-2CH <sub>3</sub> ] <sup>+</sup> , 121[M+H-CH <sub>3</sub> -C <sub>2</sub> H <sub>5</sub> O] <sup>+</sup>                                                                                                                                                                                                                                                                                                                                                                                                                                                                                                                    | c |

|    |      |                                                  |          |          |              |      |                                                  |          |                                                                                                                                                                                                                                                          |   |
|----|------|--------------------------------------------------|----------|----------|--------------|------|--------------------------------------------------|----------|----------------------------------------------------------------------------------------------------------------------------------------------------------------------------------------------------------------------------------------------------------|---|
| 15 | 4.42 | 2-O-Methyl- $\alpha$ -D-glucopyranose*           | 195.0601 | -<br>1.2 | —            | —    | C <sub>7</sub> H <sub>14</sub> O <sub>6</sub>    | 194.0790 | 195[M+H] <sup>+</sup> , 165[M+H-C <sub>2</sub> H <sub>3</sub> NO-CHN] <sup>+</sup> ,<br>137[M+H-C <sub>2</sub> H <sub>3</sub> NO-CH <sub>2</sub> O-CHN] <sup>+</sup>                                                                                     | c |
| 16 | 4.44 | M1*                                              | —        | —        | 257.083<br>8 | -3.5 | C <sub>8</sub> H <sub>18</sub> O <sub>9</sub>    | 258.0784 | 257[M-H] <sup>-</sup> , 221[M-H-2H <sub>2</sub> O] <sup>-</sup> , 179[M-H-2H <sub>2</sub> O-<br>C <sub>2</sub> H <sub>6</sub> O <sub>3</sub> ] <sup>-</sup>                                                                                              | a |
| 17 | 4.45 | M2*                                              | 410.1240 | 3.4      | —            | —    | C <sub>18</sub> H <sub>19</sub> NO <sub>10</sub> | 409.1009 | 410[M+H] <sup>+</sup> , 193[M+H-C <sub>2</sub> H <sub>3</sub> NO-C <sub>5</sub> H <sub>4</sub> O <sub>6</sub> ] <sup>+</sup> ,<br>165[M+H-C <sub>2</sub> H <sub>3</sub> NO-C <sub>5</sub> H <sub>4</sub> O <sub>6</sub> -2CH <sub>2</sub> ] <sup>+</sup> | a |
| 18 | 4.47 | M3*                                              | 181.0830 | -<br>1.1 | —            | —    | C <sub>10</sub> H <sub>12</sub> O <sub>3</sub>   | 180.0786 | 181[M+H] <sup>+</sup> , 151[M+H-2CH <sub>3</sub> ] <sup>+</sup> , 136[M+H-3CH <sub>3</sub> ] <sup>+</sup>                                                                                                                                                | d |
| 19 | 4.48 | M4*                                              | 298.1275 | -<br>5.2 | —            | —    | C <sub>14</sub> H <sub>19</sub> NO <sub>6</sub>  | 297.1212 | 298[M+H] <sup>+</sup> , 136[M+H-CHN-C <sub>10</sub> H <sub>9</sub> N <sub>2</sub> O <sub>2</sub> ] <sup>+</sup> ,<br>91[M+H-CHN-C <sub>12</sub> H <sub>14</sub> N <sub>2</sub> O <sub>3</sub> ] <sup>+</sup>                                             | d |
| 20 | 6.31 | 2-Hydroxybenzoic acid                            | —        | —        | 137.023<br>9 | -4.4 | C <sub>7</sub> H <sub>6</sub> O <sub>3</sub>     | 138.0317 | 137[M-H] <sup>-</sup> , 93[M-H-CO <sub>2</sub> ] <sup>-</sup>                                                                                                                                                                                            | c |
| 21 | 7.59 | [(2S)-5-Oxotetrahydro-2-furanyl]methyl benzoate* | 221.0785 | -<br>1.3 | —            | —    | C <sub>12</sub> H <sub>12</sub> O <sub>4</sub>   | 220.0736 | 221[M+H] <sup>+</sup> , 206[M+H-CH <sub>3</sub> ] <sup>+</sup> , 191[M+H-2CH <sub>3</sub> ] <sup>+</sup> ,<br>135[M+H-2CH <sub>3</sub> -2CO] <sup>+</sup>                                                                                                | c |
| 22 | 7.78 | Dibutyl oxalate                                  | —        | —        | 201.112<br>9 | -1   | C <sub>10</sub> H <sub>18</sub> O <sub>4</sub>   | 202.1205 | 201[M-H] <sup>-</sup> , 183[M-H-H <sub>2</sub> O] <sup>-</sup> , 139[M-H-C <sub>2</sub> H <sub>5</sub> -CH <sub>4</sub> -OH] <sup>-</sup>                                                                                                                | a |
| 23 | 7.84 | 3,4,5-Trimethoxy cinnamic acid                   | —        | —        | 237.076      | 7.2  | C <sub>12</sub> H <sub>14</sub> O <sub>5</sub>   | 238.0841 | 237[M-H] <sup>-</sup> , 197[M-H-C <sub>3</sub> H <sub>4</sub> ] <sup>-</sup> , 193[M-H-CO <sub>2</sub> ] <sup>-</sup>                                                                                                                                    | c |

|    |           |                                                              |          |          |              |      |                                                |          |                                                                                                                                                                                                                                                                                                                                                                                                                      | 3 |  |
|----|-----------|--------------------------------------------------------------|----------|----------|--------------|------|------------------------------------------------|----------|----------------------------------------------------------------------------------------------------------------------------------------------------------------------------------------------------------------------------------------------------------------------------------------------------------------------------------------------------------------------------------------------------------------------|---|--|
| 24 | 12.8<br>0 | M5*                                                          | 221.0795 | 0.9      | —            | —    | C <sub>8</sub> H <sub>12</sub> O <sub>7</sub>  | 220.0583 | 221[M+H] <sup>+</sup> ,206[M+H-CH <sub>3</sub> ] <sup>+</sup> ,191[M+H-2CH <sub>3</sub> ] <sup>+</sup> ,<br>135[M+H-2CH <sub>3</sub> -C <sub>3</sub> H <sub>5</sub> O] <sup>+</sup>                                                                                                                                                                                                                                  | c |  |
| 25 | 13.7<br>6 | Acoronene                                                    | 235.1698 | 1.1      | —            | —    | C <sub>15</sub> H <sub>22</sub> O <sub>2</sub> | 234.1620 | 235[M+H] <sup>+</sup> ,217[M+H-CH <sub>6</sub> ] <sup>+</sup> ,<br>189[M+H-C <sub>3</sub> H <sub>10</sub> ] <sup>+</sup> ,119[M+H-C <sub>7</sub> H <sub>16</sub> O] <sup>+</sup>                                                                                                                                                                                                                                     | d |  |
| 26 | 13.8<br>1 | M6*                                                          | 373.1637 | 3.3      | —            | —    | C <sub>17</sub> H <sub>24</sub> O <sub>9</sub> | 372.1420 | 373[M+H] <sup>+</sup> ,355[M+H-H <sub>2</sub> O] <sup>+</sup> ,151[M+H-C <sub>5</sub> H <sub>8</sub> O <sub>6</sub> -<br>2CH <sub>3</sub> -CH] <sup>+</sup>                                                                                                                                                                                                                                                          | d |  |
| 27 | 14.9<br>7 | Poricoic acid H                                              | —        | —        | 499.342<br>4 | -0.8 | C <sub>31</sub> H <sub>48</sub> O <sub>5</sub> | 500.3502 | 499[M-H] <sup>-</sup> ,481[M-H-H <sub>2</sub> O] <sup>-</sup> ,<br>419[M-H-C <sub>6</sub> H <sub>8</sub> ] <sup>-</sup> ,389[M-H-C <sub>7</sub> H <sub>10</sub> -O] <sup>-</sup><br>487[M+H] <sup>+</sup> ,407[M+H-H <sub>2</sub> O-CH <sub>2</sub> O <sub>2</sub> -CH <sub>4</sub> ] <sup>+</sup> ,                                                                                                                 | b |  |
| 28 | 15.7<br>6 | Poricoic acid G                                              | —        | —        | 485.326<br>7 | -3.5 | C <sub>30</sub> H <sub>46</sub> O <sub>5</sub> | 486.3345 | 201[M+H-C <sub>19</sub> H <sub>26</sub> O <sub>2</sub> ] <sup>+</sup> ,159[M+H-C <sub>8</sub> H <sub>12</sub> O <sub>2</sub> -C <sub>11</sub> H <sub>24</sub> O <sub>2</sub> ] <sup>+</sup> ,<br>485[M-H] <sup>-</sup> ,425[M-H-CH <sub>4</sub> -CO <sub>2</sub> ] <sup>-</sup> ,<br>387[M-H-C <sub>6</sub> H <sub>9</sub> -OH] <sup>-</sup> ,369[M-H-C <sub>6</sub> H <sub>12</sub> -CO <sub>2</sub> ] <sup>-</sup> | b |  |
| 29 | 17.5<br>9 | Gomisin A                                                    | 417.1875 | 1.2      | —            | —    | C <sub>23</sub> H <sub>28</sub> O <sub>7</sub> | 416.1835 | 417[M+H] <sup>+</sup> ,224[M+H-C <sub>11</sub> H <sub>13</sub> O <sub>3</sub> ] <sup>+</sup> ,<br>193[M+H-C <sub>12</sub> H <sub>16</sub> O <sub>4</sub> ] <sup>+</sup> ,165[M+H-C <sub>14</sub> H <sub>20</sub> O <sub>4</sub> ] <sup>+</sup>                                                                                                                                                                       | a |  |
| 30 | 17.6<br>2 | 3β,16α-Dihydroxylanosta-<br>7,9(11),24-trien-<br>21-oic acid | 471.3474 | -<br>5.9 | —            | —    | C <sub>30</sub> H <sub>46</sub> O <sub>4</sub> | 470.3396 | 471[M+H] <sup>+</sup> ,453[M+H-H <sub>2</sub> O] <sup>+</sup> ,<br>407[M+H-CH <sub>2</sub> O <sub>2</sub> -H <sub>2</sub> O] <sup>+</sup> ,313[M+H-C <sub>8</sub> H <sub>12</sub> O <sub>2</sub> -H <sub>2</sub> O] <sup>+</sup> ,<br>469[M-H] <sup>-</sup> ,407[M-H-CO <sub>2</sub> -H <sub>2</sub> O] <sup>-</sup> ,                                                                                               | b |  |

|    |           |                                                                 |          |          |              |      |                                                |          |                                                                                                                                                                                                    |   |
|----|-----------|-----------------------------------------------------------------|----------|----------|--------------|------|------------------------------------------------|----------|----------------------------------------------------------------------------------------------------------------------------------------------------------------------------------------------------|---|
|    |           |                                                                 |          |          |              |      |                                                |          | 367[M-H-C <sub>6</sub> H <sub>12</sub> -H <sub>2</sub> O] <sup>-</sup>                                                                                                                             |   |
| 31 | 17.6<br>6 | Poricoic acid B                                                 | —        | —        | 483.311<br>1 | -1.9 | C <sub>30</sub> H <sub>44</sub> O <sub>5</sub> | 484.3189 | 483[M-H] <sup>-</sup> ,439[M-H-CO <sub>2</sub> ] <sup>-</sup> ,<br>409[M-H-CO <sub>2</sub> -2CH <sub>2</sub> ] <sup>-</sup> ,367[M-H-2CO <sub>2</sub> -2CH <sub>2</sub> ] <sup>-</sup>             | b |
| 32 | 17.9<br>0 | 6,7-Dehydroporicoic acid H                                      | —        | —        | 497.326<br>7 | -2.6 | C <sub>31</sub> H <sub>46</sub> O <sub>5</sub> | 498.3345 | 497[M-H] <sup>-</sup> ,479[M-H-H <sub>2</sub> O] <sup>-</sup> ,<br>453[M-H-2CH <sub>3</sub> -CH <sub>2</sub> ] <sup>-</sup> ,423[M-H-C <sub>2</sub> H <sub>6</sub> -CO <sub>2</sub> ] <sup>-</sup> | b |
|    |           |                                                                 |          |          |              |      |                                                |          | 469[M+H] <sup>+</sup> ,451[M+H-H <sub>2</sub> O] <sup>+</sup> ,                                                                                                                                    |   |
| 33 | 17.9<br>7 | 16-Deoxyporicoic acid B                                         | —        | —        | 467.316<br>1 | 4.7  | C <sub>30</sub> H <sub>44</sub> O <sub>4</sub> | 468.3240 | 311[M+H-C <sub>8</sub> H <sub>12</sub> O <sub>2</sub> -H <sub>2</sub> O] <sup>+</sup> ,293[M+H-C <sub>8</sub> H <sub>12</sub> O <sub>2</sub> -<br>CH <sub>8</sub> O] <sup>+</sup>                  | b |
|    |           |                                                                 |          |          |              |      |                                                |          | 467[M-H] <sup>-</sup> ,423[M-H-CO <sub>2</sub> ] <sup>-</sup> ,                                                                                                                                    |   |
|    |           |                                                                 |          |          |              |      |                                                |          | 407[M-H-CO <sub>2</sub> -CH <sub>4</sub> ] <sup>-</sup> ,374[M-H-C <sub>7</sub> H <sub>9</sub> ] <sup>-</sup>                                                                                      |   |
| 34 | 18.0<br>4 | Tumulolic acid                                                  | —        | —        | 485.363<br>1 | 2.3  | C <sub>31</sub> H <sub>50</sub> O <sub>4</sub> | 486.3709 | 485[M-H] <sup>-</sup> ,441[M-H-CO <sub>2</sub> ] <sup>-</sup> ,423[M-H-CO <sub>2</sub> -H <sub>2</sub> O] <sup>-</sup>                                                                             | b |
| 35 | 18.0<br>9 | cis/trans-Methylisoeugenol                                      | 179.0726 | 6.7      | —            | —    | C <sub>11</sub> H <sub>14</sub> O <sub>2</sub> | 178.0994 | 179[M+H] <sup>+</sup> ,165[M+H-CH <sub>2</sub> ] <sup>+</sup> ,<br>151[M+H-2CH <sub>2</sub> ] <sup>+</sup> ,121[M+H-2CH <sub>3</sub> -2CH-2H] <sup>+</sup>                                         | d |
|    |           |                                                                 |          |          |              |      |                                                |          | 513[M+H] <sup>+</sup> ,495[M+H-H <sub>2</sub> O] <sup>+</sup> ,                                                                                                                                    |   |
| 36 | 18.1<br>9 | 3β-Hydroxy-16α-acetoxy-lanosta-<br>7,9(11),24-trien-21-oic acid | 513.3580 | -<br>1.9 | —            | —    | C <sub>32</sub> H <sub>48</sub> O <sub>5</sub> | 512.3502 | 453[M+H-COCH <sub>3</sub> -OH] <sup>+</sup> ,<br>355[M+H-C <sub>8</sub> H <sub>12</sub> O <sub>2</sub> -H <sub>2</sub> O] <sup>+</sup> ,                                                           | b |
|    |           |                                                                 |          |          |              |      |                                                |          | 295[M+H-C <sub>8</sub> H <sub>12</sub> O <sub>2</sub> -CH <sub>4</sub> O <sub>2</sub> -H <sub>2</sub> O] <sup>+</sup> ,                                                                            |   |

|    |           |                                                              |          |          |              |      |                                                |          |                                                                                                                                                                                                                                                                                                                                                                                                                           |   |
|----|-----------|--------------------------------------------------------------|----------|----------|--------------|------|------------------------------------------------|----------|---------------------------------------------------------------------------------------------------------------------------------------------------------------------------------------------------------------------------------------------------------------------------------------------------------------------------------------------------------------------------------------------------------------------------|---|
| 37 | 18.3<br>1 | Daedaleanic acid A                                           | —        | —        | 481.331<br>8 | -3.7 | C <sub>31</sub> H <sub>46</sub> O <sub>4</sub> | 482.3396 | 483[M+H] <sup>+</sup> ,465[M+H-H <sub>2</sub> O] <sup>+</sup> ,<br>419[M+H-C <sub>3</sub> H <sub>10</sub> -H <sub>2</sub> O] <sup>+</sup> ,309[M+H-C <sub>9</sub> H <sub>16</sub> O <sub>2</sub> -H <sub>2</sub> O] <sup>+</sup> ,<br>481[M-H] <sup>-</sup> ,437[M-H-CO <sub>2</sub> ] <sup>-</sup> ,<br>421[M-H-C <sub>3</sub> H <sub>8</sub> -O] <sup>-</sup> ,403[M-H-C <sub>3</sub> H <sub>8</sub> -2HO] <sup>-</sup> | b |
| 38 | 18.4<br>8 | (5ξ,20S)-24-Methylene-3-oxolanosta-7,9(11)-dien-21-oic acid* | —        | —        | 465.312<br>7 | -1.9 | C <sub>31</sub> H <sub>46</sub> O <sub>3</sub> | 466.3447 | 465[M-H] <sup>-</sup> ,421[M-H-CO <sub>2</sub> -2H <sub>2</sub> O] <sup>-</sup> ,<br>403[M-H--2CH <sub>3</sub> -CH <sub>2</sub> -2H <sub>2</sub> O] <sup>-</sup>                                                                                                                                                                                                                                                          | b |
| 39 | 18.4<br>9 | Dehydroeburiconic acid                                       | 467.3525 | 0.2      | —            | —    | C <sub>31</sub> H <sub>46</sub> O <sub>3</sub> | 466.3447 | 467[M+H] <sup>+</sup> ,449[M+H-H <sub>2</sub> O] <sup>+</sup> ,<br>311[M+H-C <sub>9</sub> H <sub>16</sub> O <sub>2</sub> ] <sup>+</sup> ,293[M+H-C <sub>10</sub> H <sub>22</sub> O <sub>2</sub> ] <sup>+</sup>                                                                                                                                                                                                            | b |
| 40 | 18.5<br>0 | Dehydrotu-mulosic acid                                       | —        | —        | 483.347<br>4 | -2.3 | C <sub>31</sub> H <sub>48</sub> O <sub>4</sub> | 484.3553 | 483[M-H] <sup>-</sup> ,437[M-H-CH <sub>2</sub> O <sub>2</sub> ] <sup>-</sup> ,<br>421[M-H-CO <sub>2</sub> -H <sub>2</sub> O] <sup>-</sup> ,337[M-H-C <sub>6</sub> H <sub>12</sub> -CO <sub>2</sub> -H <sub>2</sub> O] <sup>-</sup>                                                                                                                                                                                        | b |
| 41 | 18.7<br>1 | 2,6-Di-sec-butyl-4-methylphenol                              | 221.1905 | -<br>7.2 | —            | —    | C <sub>15</sub> H <sub>24</sub> O              | 220.1827 | 221[M+H] <sup>+</sup> ,203[M+H-CH <sub>6</sub> ] <sup>+</sup> ,<br>193[M+H-CH <sub>3</sub> -CH] <sup>+</sup> ,133[M+H-CH <sub>3</sub> -CH-4CH <sub>3</sub> ] <sup>+</sup>                                                                                                                                                                                                                                                 | a |
| 42 | 19.9<br>9 | Pachymic acid                                                | —        | —        | 527.373<br>7 | -0.8 | C <sub>33</sub> H <sub>52</sub> O <sub>5</sub> | 528.3815 | 527[M-H] <sup>-</sup> ,483[M-H-C <sub>2</sub> H <sub>4</sub> O] <sup>-</sup> ,<br>465[M-H-C <sub>2</sub> H <sub>4</sub> O-H <sub>2</sub> O] <sup>-</sup> ,221[M-H-C <sub>18</sub> H <sub>26</sub> O <sub>4</sub> ] <sup>-</sup>                                                                                                                                                                                           | b |

Note: a: Ginseng Radix; b: Poria; c: Polygalae Radix; d: Acori Tatarinowii Rhizoma; \* means the metabolites;

42 components were identified by pattern recognition methods, 21 of them were detected in positive ion mode and others were detected in negative mode.

**Table S2.** The identified results of the constituents in rat plasma after oral administration of KXS by Metabolynx software.

| No  | Rt/<br>min | Compound                                   | Positive (m/z) |     | Negative (m/z) |     | Formula                                         | MW(Da)   | Fragment ions (m/z)                                                                                                                                                                       | Origin |
|-----|------------|--------------------------------------------|----------------|-----|----------------|-----|-------------------------------------------------|----------|-------------------------------------------------------------------------------------------------------------------------------------------------------------------------------------------|--------|
| I   | 2.07       | 3-(2-furyl)-3-oxopropanenitrile            | 136.0544       | 0.9 | —              | —   | C <sub>7</sub> H <sub>5</sub> NO <sub>2</sub>   | 135.0320 | 136[M+H] <sup>+</sup> , 119[M+H-OH] <sup>+</sup> , 109[M+H-CHN] <sup>+</sup>                                                                                                              | d      |
| II  | 2.27       | M7                                         | —              | —   | 307.048        | 3.7 | C <sub>14</sub> H <sub>12</sub> O <sub>8</sub>  | 308.0532 | 307[M-H] <sup>-</sup> , 247[M-H - C <sub>2</sub> H <sub>4</sub> O <sub>2</sub> ] <sup>-</sup> , 227[M-H-C <sub>2</sub> H <sub>8</sub> O <sub>3</sub> ] <sup>-</sup>                       | c      |
| III | 2.61       | N-(2,5-Dimethoxyphenyl)-2-methoxyacetamide | 226.1137       | 2.7 | —              | —   | C <sub>11</sub> H <sub>15</sub> NO <sub>4</sub> | 225.1001 | 226[M+H] <sup>+</sup> , 210[M+H-CH <sub>3</sub> ] <sup>+</sup> , 167[M+H-CH <sub>3</sub> N-2CH <sub>3</sub> ] <sup>+</sup> ,<br>152[M+H-CH <sub>3</sub> N-3CH <sub>3</sub> ] <sup>+</sup> | d      |
| IV  | 2.91       | M8                                         | —              | —   | 289.037        | 2.1 | C <sub>14</sub> H <sub>10</sub> O <sub>7</sub>  | 290.0427 | 289[M-H] <sup>-</sup> , 274[M-H-CH <sub>3</sub> ] <sup>-</sup> , 263[M-H-CH <sub>3</sub> -2CH] <sup>-</sup>                                                                               | c      |
| V   | 9.25       | M9                                         | —              | —   | 273.043        | 4.6 | C <sub>10</sub> H <sub>10</sub> O <sub>9</sub>  | 274.0324 | 273[M-H] <sup>-</sup> , 193[M-H-Glc] <sup>-</sup> , 163[M-H-Glc-CH <sub>2</sub> O] <sup>-</sup> ,<br>135[M-H-Glc-CH <sub>2</sub> O-C <sub>2</sub> H <sub>4</sub> ] <sup>-</sup>           | a      |
| VI  | 18.3       | M10                                        | —              | —   | 507.372        | 4.5 | C <sub>33</sub> H <sub>48</sub> O <sub>4</sub>  | 508.3553 | 507[M-H] <sup>-</sup> , 461[M-H-2CH <sub>2</sub> -H <sub>2</sub> O] <sup>-</sup>                                                                                                          | b      |
| VII | 20.6       | M11                                        | 299.1357       | 4.6 | —              | —   | C <sub>14</sub> H <sub>18</sub> O <sub>7</sub>  | 298.1053 | 299[M+H] <sup>+</sup> , 284[M+H-CH <sub>3</sub> ] <sup>+</sup> ,<br>271[M+H-CO] <sup>+</sup> , 134[M+H-C <sub>5</sub> H <sub>10</sub> O <sub>5</sub> -CH <sub>3</sub> ] <sup>+</sup>      | c      |

Note: a: Ginseng Radix; b: Poria; c: Polygalae Radix; d: Acori Tatarinowii Rhizoma; three metabolites were identified in positive ion mode and four metabolites were identified in negative ion mode. Glc: β-D-glucose; Xyl: β-D-xylose; Fru: β-D-fructose; Api: β-D-Apiose.
